# Supplementary material for: Factors Related to Mental Health of Foreign Care Workers in Long-Term Care Facilities in Japan during the COVID-19 Pandemic—A Comparative Study
Source: MDPI journal article supplement (doi:10.3390/ijerph192416491), 2022-12-08
Supplement: s1 [file s1]

Supplementary File S2

**Table S1. Characteristics of foreign care workers (N=172) .**

| Items                                       | Foreign care workers<br>n (%) |
|---------------------------------------------|-------------------------------|
| <b>Nationality</b>                          |                               |
| Vietnamese                                  | 54 (31.40)                    |
| Indonesian                                  | 50 (29.07)                    |
| Philippine                                  | 38 (22.09)                    |
| Nepalese                                    | 14 (8.14)                     |
| Chinese                                     | 12 (6.98)                     |
| Brazilian                                   | 4 (2.33)                      |
| <b>Japanese Language Proficiency Test†</b>  |                               |
| N1                                          | 23 (12.79)                    |
| N2                                          | 61 (35.47)                    |
| N3                                          | 75 (43.60)                    |
| N4                                          | 11 (6.40)                     |
| Unknown                                     | 2 (1.16)                      |
| <b>Satisfaction with migration</b>          |                               |
| Extremely satisfied                         | 20 (11.63)                    |
| Somewhat satisfied                          | 96 (55.81)                    |
| Neither satisfied nor dissatisfied          | 46 (26.74)                    |
| Somewhat dissatisfied                       | 8 (4.65)                      |
| <b>Feeling discriminated as a foreigner</b> |                               |
| Never                                       | 47 (27.33)                    |
| Seldom                                      | 99 (57.56)                    |
| Sometimes                                   | 26 (15.12)                    |

† The Japanese-Language Proficiency Test is conducted both in Japan and outside Japan to evaluate and certify the language proficiency of primarily non-native speakers of Japanese since 1984. N4 and N5 measure the level of understanding of basic Japanese mainly learned in class. N1 and N2 measure the level of understanding of Japanese used in a broad range of scenes in actual everyday life. N3 is a bridging level between N1/N2 and N4/N5.

**Table 7 Cultural adaptation of foreign care workers. (N=172)**

| Items                                         | Foreign care workers<br>n (%) |
|-----------------------------------------------|-------------------------------|
| <b>Getting used to the food in Japan</b>      |                               |
| Extremely difficult                           | 14 (8.14)                     |
| Difficult                                     | 14 (8.14)                     |
| Moderately difficult                          | 40 (23.26)                    |
| A slightly difficult                          | 88 (51.16)                    |
| Easy                                          | 16 (9.30)                     |
| <b>Making friends in Japan</b>                |                               |
| Extremely difficult                           | 42 (24.42)                    |
| Difficult                                     | 37 (21.51)                    |
| Moderately difficult                          | 57 (33.14)                    |
| A slightly difficult                          | 23 (13.37)                    |
| Easy                                          | 13 (7.56)                     |
| <b>Disaster preparedness in Japan</b>         |                               |
| Extremely difficult                           | 7 (8.14)                      |
| Difficult                                     | 27 (8.14)                     |
| Moderately difficult                          | 40(23.26)                     |
| A slightly difficult                          | 93(51.16)                     |
| Easy                                          | 5 (9.30)                      |
| <b>House-hunt in Japan</b>                    |                               |
|                                               | 9 (5.23)                      |
| Extremely difficult                           | 25 (14.53)                    |
| Difficult                                     | 36 (20.93)                    |
| Moderately difficult                          | 87 (50.58)                    |
| A slightly difficult                          | 15 (8.72)                     |
| Easy                                          |                               |
| <b>Worshipping in your usual way in Japan</b> |                               |
| Extremely difficult                           | 5 (2.91)                      |
| Difficult                                     | 14 (8.14)                     |
| Moderately difficult                          | 19 (11.05)                    |
| A slightly difficult                          | 80 (46.51)                    |
| Easy                                          | 54 (31.39)                    |
